# Supplementary material for: Middle-term prognosis in patients with ulcerative colitis who achieved clinical and endoscopic remission by budesonide rectal foam
Source: PubMed Central journal article supplement (PMC6681969; doi:10.1371/journal.pone.0220413), 2019-08-05
Supplement: pone.0220413.s001.pdf [file pone.0220413.s001.pdf]

| Valuables                                        |                                             | <i>P</i> -<br>value <sup>a</sup> | <i>P</i> -<br>value <sup>b</sup> | HR   | 95% CI       |
|--------------------------------------------------|---------------------------------------------|----------------------------------|----------------------------------|------|--------------|
| Sex                                              | Female / male                               | 0.154                            | 0.159                            | 1.76 | (0.80, 3.89) |
| Age (df = 1)                                     |                                             |                                  | 0.375                            | 0.98 | (0.95, 1.02) |
| Body weight (df = 1)                             |                                             |                                  | 0.019                            | 0.96 | (0.93, 0.99) |
| Regimen of budesonide foam                       | Twice daily / once daily                    | 0.345                            | 0.357                            | 0.66 | (0.28, 1.59) |
| Smoking habit                                    | No / Yes                                    | NA                               | NA                               | NA   | NA           |
| Duration of disease (year)                       | <1 / ≥5                                     | 0.016                            | 0.008                            | 4.07 | (1.45, 11.5) |
|                                                  | ≥1 to <5 / ≥5                               |                                  | 0.505                            | 1/37 | (0.54, 3.49) |
| Clinical course at the phase 2 or phase 3 trials | Relapsing-remitting / first attack          | 0.747                            | 0.748                            | 0.79 | (0.18, 3.40) |
| Extension of Disease                             | Proctitis / pancolitis                      | 0.071                            | 0.992                            | NA   | NA           |
|                                                  | Left-sided colitis / pancolitis             |                                  | 0.992                            | NA   | NA           |
| Extension of Disease 2                           | Pancolitis + left-sided colitis / Proctitis | 0.893                            | 0.893                            | 1.06 | (0.48, 3.40) |
| Extension of Disease 3                           | Pancolitis / proctitis + left-sided colitis | 0.040                            | 0.992                            | NA   | NA           |
| Severity                                         | Modulate / mild                             | 0.500                            | 0.501                            | 1.32 | (0.59, 2.94) |
| Oral 5-ASA                                       | No / max dose <sup>d</sup>                  | 0.564                            | 0.546                            | 1.44 | (0.44, 2.94) |
|                                                  | <the max dose / max dose                    |                                  | 0.550                            | 0.77 | (0.33, 1.82) |
| Topical 5-ASA                                    | Yes /No                                     | 0.779                            | 0.779                            | 0.88 | (0.35, 2.20) |
| Topical corticosteroid <sup>e</sup>              | Yes /No                                     | 0.191                            | 0.191                            | 1.93 | (0.71, 5.29) |

5-ASA, 5-Aminosalicylic acid; CI, confidence interval; df, degrees of freedom; NA, not available

- a. Two-tailed *P*-value with log rank test
- b. Two-tailed *P*-value with univariate Cox regression
- c. Endoscopic subscore in a Modified Mayo Disease Activity Index subscore.
- d. Max dose of 5-ASA: Pentasa tablet and Salazopyrin tablet (4000 mg), Asacol tablet (3600 mg)
- e. Suppository or enema. One case used corticoid injection.
